1                   **No endospore formation confirmed in members of the phylum Proteobacteria**

2

3                   Polina Beskrovnaya<sup>a</sup>, Doaa Fakh<sup>b</sup>, Danielle L. Sexton<sup>a</sup>, Shipei Xing<sup>c</sup>, Mona

4                   Golmohammadzadeh<sup>a</sup>, Isabelle Morneau<sup>b</sup>, Dainelys Guadarrama Bello<sup>b</sup>, Antonio Nanci<sup>b</sup>, Tao

5                                           Huan<sup>c</sup>, Elitza I. Tocheva<sup>a,b\*</sup>

6

7                   <sup>a</sup>Department of Microbiology & Immunology, The University of British Columbia, Vancouver,

8                   BC, Canada.

9                   <sup>b</sup>Department of Stomatology, Université de Montréal, Montréal, QC, Canada.

10                   <sup>c</sup>Department of Chemistry, The University of British Columbia, Vancouver, British Columbia,

11                   Canada.

12

13                   \***Address for Correspondence:** Elitza Tocheva, e-mail: [elitza.tocheva@ubc.ca](mailto:elitza.tocheva@ubc.ca)

14

15                   **Running title:** No endospores in Proteobacteria

16

17

18

## 19 **Abstract**

20 Endospore formation is used by members of the phylum Firmicutes to withstand extreme  
21 environmental conditions. Several recent studies have documented endospore formation in species  
22 outside of Firmicutes, particularly in *Rhodobacter johrii* and *Serratia marcescens*, members of the  
23 phylum Proteobacteria. Here, we aimed to investigate endospore formation in these two species  
24 by using advanced imaging and analytical approaches. Examination of the phase-bright structures  
25 observed in *R. johrii* and *S. marcescens* using cryo-electron tomography failed to identify  
26 endospores or stages of endospore formation. We determined that the phase-bright objects in *R.*  
27 *johrii* cells were triacylglycerol storage granules and those in *S. marcescens* were aggregates of  
28 cellular debris. In addition, *R. johrii* and *S. marcescens* containing phase-bright objects do not  
29 possess phenotypic and genetic features of endospores, including enhanced resistance to heat,  
30 presence of dipicolinic acid, or the presence of many of the genes associated with endospore  
31 formation. Our results support the hypothesis that endospore formation is restricted to the phylum  
32 Firmicutes.

33

## 34 **Importance**

35 Endospore formation is a mechanism that allows bacteria to generate resilient dormant spores  
36 under harsh environmental conditions. Although this process has been traditionally restricted to  
37 the largely Gram-positive bacteria of the phylum Firmicutes, recent studies have also described  
38 endospores in some Proteobacteria. High complexity of endosporulation, reflected in extensive  
39 morphological transformations governed by hundreds of conserved genes, hinders its facile  
40 acquisition via horizontal gene transfer. Therefore, ability of distantly related bacteria to produce

41 endospores would imply an ancient nature of this mechanism and potentially a pivotal role in  
42 species diversification and outer membrane biogenesis.

43

44 **Keywords:** Endospores; Firmicutes; cryo-electron tomography; correlative light electron  
45 microscopy; whole cell lipidomic analysis; EDX of storage granules; Proteobacteria; *Rhodobacter*;  
46 *Serratia*.

47

## 48 **Introduction**

49 Spores represent a dormant state of bacteria that can persist for millions of years (1-3). Bacterial  
50 sporulation encompasses diverse modes, however, it is typically triggered by starvation and  
51 ultimately results in the production of metabolically inactive cells displaying increased resilience  
52 to stressors. For example, low nitrogen or carbon availability in Firmicutes can stimulate formation  
53 of endospores resistant to UV radiation, extreme pH, high temperature and pressure (4-6).  
54 Similarly, exosporulation in Actinobacteria and fruiting body production in *Myxococcus* have also  
55 been linked to nutrient limitation and can serve for preservation of genetic material under  
56 unfavourable environmental conditions (7-9). Despite the apparent similarities between these  
57 different types of sporulation, the underlying transformations are morphologically distinct and  
58 encoded by non-homologous pathways (10).

59

60 Endospore formation begins with asymmetric cell division, with the septum placed near one pole  
61 of the cell, and produces two cells with different fates (11-13). Upon septation, the smaller  
62 compartment becomes engulfed through a phagocytosis-like mechanism, yielding a prespore  
63 bound by two lipid membranes in the cytoplasm of the mother cell. Subsequent endospore  
64 maturation involves the synthesis of protective layers, such as the peptidoglycan-based cortex and  
65 proteinaceous coat. Metabolic inactivation is achieved by gradual dehydration of the core through  
66 replacement of water with dipicolinic acid (DPA) and calcium ions, and compaction of DNA with  
67 DNA-binding proteins. Together, these modifications account for the resistance properties of  
68 endospores (14). Ultimately, the spore is released upon lysis of the mother cell (15). In contrast,  
69 other modes of sporulation, such as those observed in Actinobacteria and *Myxococcus* sp., produce  
70 spores through morphological differentiation and cell division without engulfment.

71  
72 Several studies in the past decade have reported, but not proven, formation of endospores in  
73 Proteobacteria (16, 17). While endospore formation has recently been confirmed in some Gram-  
74 negative bacteria, all of the identified organisms still belong to the phylum Firmicutes, highlighting  
75 the question of evolutionary origins of bacterial outer membrane (18). Additionally, sporulation  
76 involves tight cooperation of hundreds of genes distributed across the chromosome, hindering  
77 acquisition of this pathway through horizontal gene transfer (10, 19). Therefore, if confirmed,  
78 presence of the ability to form endospores across distantly related bacterial phyla suggests an  
79 ancient nature of the process and can provide clues to the characteristics of the last bacterial  
80 common ancestor (10). Here, we investigated two recent articles attributing sporulation to  
81 members of Proteobacteria (16, 17). Briefly, Girija *et al.* (17) described endospore production in  
82 the purple, non-sulfur bacterium *R. johrii*, strain JA192(T), a close relative of the model organism  
83 for bacterial photosynthesis *R. sphaeroides*. The second study by Ajithkumar *et al.* (16) reported  
84 endospore formation in *S. marcescens* subsp. *sakuensis* (strain no. 9; KRED<sup>T</sup>), a pathogenic  
85 bacterium that infects humans and causes bacteremia, urinary tract infection and wound infections  
86 (20). Thus, confirmation and further characterization of endospore formation in these organisms  
87 can bring valuable insight into the physiology of these species and the role of endospore formation  
88 in diversification and speciation of modern phyla.

89  
90 In this study, we employed cutting edge structural biology techniques, such as cryo-electron  
91 tomography (cryo-ET), correlative light and electron microscopy (CLEM), and energy-dispersive  
92 X-ray spectroscopy (EDX), as well as biochemical and microbiological approaches, to characterize  
93 endospore formation in *R. johrii* and *S. marcescens*. Our results showed that *R. johrii* and *S.*

94 *marcescens* were unable to form endospores as previously reported (16, 17). Further analyses  
95 indicated that the putative spores in *R. johrii* were lipid storage granules rich in triacylglycerols  
96 (TAGs), and the phase-bright objects in *S. marcescens* were aggregates of cellular debris. Overall,  
97 our observations contradict the previously published studies by Girija *et al.* and Ajithkumar *et al.*,  
98 and support the observation that these members of Proteobacteria are unable to form endospores.  
99

## 100 **Materials and Methods**

### 101 *Bacterial strains and growth conditions*

102 *R. johrii* and *S. marcescens* cells were purchased from Leibniz-Institut DSMZ bacterial strain  
103 collection. *R. johrii* JA192 cells (DSMZ 18678) were cultivated as previously described by Girija  
104 *et al.* (17). Briefly, cells were grown aerobically at room temperature in *R. sphaeroides* solid and  
105 liquid medium comprising 4 mM KH<sub>2</sub>PO<sub>4</sub>, 1 mM MgCl<sub>2</sub>·6H<sub>2</sub>O, 7 mM NaCl, 22 mM NH<sub>4</sub>Cl, 0.04  
106 mM CaCl<sub>2</sub>·2H<sub>2</sub>O, 17 mM sorbitol, 28 mM sodium pyruvate, 1.5 mM yeast extract, 1 L distilled  
107 water, pH 7.0, 1 ml trace element solution SL7, and 20 ng Vitamin B<sub>12</sub> solution for 2 days for  
108 vegetative cells or 7 days to induce production of phase-bright objects. Additionally, cells were  
109 grown in Luria-Bertani (LB) broth at 30 °C with agitation for 2 days, and either harvested as the  
110 vegetative growth control or subsequently inoculated 1:100 into modified M9 medium for an  
111 additional 7 days to induce formation of phase-bright objects. The modified M9 medium contained  
112 47.8 mM Na<sub>2</sub>HPO<sub>4</sub>, 22 mM KH<sub>2</sub>PO<sub>4</sub>, 8.56 mM NaCl, 18.7 mM (3.74 mM for limited nitrogen)  
113 NH<sub>4</sub>Cl, 1 mM MgSO<sub>4</sub>, 0.3 mM CaCl<sub>2</sub>, 0.4 % (w/v) glucose, 1 µg/L biotin, 1 µg/L thiamine, 31  
114 µM FeCl<sub>3</sub>·6H<sub>2</sub>O, 12.5 µM ZnCl<sub>2</sub>, 2.5 µM CuCl<sub>2</sub>·2H<sub>2</sub>O, 2.5 µM CoCl<sub>2</sub>·2H<sub>2</sub>O, 5 µM MnCl<sub>2</sub>·4H<sub>2</sub>O,  
115 2.5 µM Na<sub>2</sub>MoO<sub>4</sub>·2H<sub>2</sub>O. *S. marcescens* cells (DSMZ 30121) were cultivated in LB broth at 32 °C  
116 with shaking at 200 rpm, as previously described by Ajithkumar *et al.* (16), for 7 days for  
117 vegetative growth or 65 days to induce formation of phase-bright objects. *B. subtilis* strain PY79  
118 was chosen as the positive control for endospore formation, and cells were cultivated in LB broth  
119 at 37 °C with shaking at 200 rpm overnight for vegetative growth or for 3 days to induce  
120 sporulation. LB agar was used for cultivation on plates for *S. marcescens* and *B. subtilis*.

121

### 122 *Detection of phase-bright objects using phase-contrast light microscopy*

123 *R. johrii* and *S. marcescens* cultures were pelleted and washed with 1x phosphate buffer saline  
124 (PBS, pH 7.4) composed of 137 mM NaCl, 27mM KCl, 10 mM Na<sub>2</sub>HPO<sub>4</sub>, 1.8 mM KH<sub>2</sub>PO<sub>4</sub>. Cells  
125 were imaged with an upright Zeiss Axio Imager M2 Microscope (Carl Zeiss, Oberkochen,  
126 Germany) equipped with a 506 monochrome camera, and a 100x oil objective lens with a  
127 numerical aperture (NA) of 1.46.

128

### 129 *Sample preparation for correlative light and cryo electron tomography*

130 *R. johrii* cells were lightly fixed using 2.5 % paraformaldehyde in 30mM phosphate buffer for 15  
131 min, washed twice and resuspended in 150 mM phosphate buffer. Bacterial cells were loaded onto  
132 Cu Finder R 2/2 EM grids (Electron Microscopy Sciences, Hatfield, USA), coated with 1 mg/ml  
133 poly-L-lysine, and subsequently imaged at room temperature as described above. Following room  
134 temperature light microscopy, 20-nm colloidal gold particles (UMC Utrecht, Netherlands) were  
135 added and samples were plunge-frozen into liquid ethane-propane mix cooled at liquid nitrogen  
136 temperatures with a Mark IV Vitrobot (Thermo Fisher Scientific), maintained at room temperature  
137 and 70 % humidity. Cryo-ET was conducted on cells with phase-bright signal as described below.

138

### 139 *Cryo-ET sample preparation*

140 For standalone cryo-ET experiments, samples were mixed with 20-nm colloidal gold particles,  
141 loaded onto glow-discharged carbon grids (R2/2, Quantifoil) and plunge-frozen into liquid ethane-  
142 propane mix cooled at liquid nitrogen temperatures with a Mark IV Vitrobot(Thermo Fisher  
143 Scientific) maintained at room temperature and 70 % humidity.

144

### 145 *Cryo-ET data collection*



146 For both standalone cryo-ET and CLEM experiments, tilt-series were collected on an 300kV Titan  
147 Krios transmission electron microscope (Thermo Fisher Scientific) equipped with a Falcon 2  
148 camera. Tilt series were collected at 14-18K x nominal magnification, 1-3 degrees oscillations and  
149 a final dose of 30-150  $e^-/A^2$ . Three-dimensional reconstructions were calculated with IMOD using  
150 the weighted back projection method (21).

151

### 152 *Correlative LM and SEM with EDX analysis*

153 *R. johrii* cells were fixed by 12.5% paraformaldehyde in 150 mM sodium phosphate buffer (73.6  
154 mM  $K_2HPO_4$ , 26.4 mM  $KH_2PO_4$ ) pH 7.5, then washed three times with 150mM sodium phosphate  
155 buffer (22). Glow-discharged Cu R2/2 grids were coated with poly-L-lysine hydrobromide  
156 solution (1 mg/ml) and dried for 30 mins at 60 °C. Fixed cells were loaded onto the grids and  
157 immediately imaged with LM in 1x PBS to identify phase-bright objects. The grids were  
158 subsequently air dried, and regions of interest identified with LM were examined with SEM using  
159 JEOL JSM-7400F (JEOL Ltd., Tokyo, Japan) operated at 5 kV without any coating. EDX analysis  
160 with a silicon-drift detector (Octane, EDAX Inc., Mahwah, NJ, USA) at 10 kV was used for semi-  
161 quantitative elemental analysis of regions of interest.

162

### 163 *Whole-cell lipidomic analysis of R. johrii*

164 *R. johrii* cells displaying phase-bright properties were cultivated as described above, harvested by  
165 centrifugation (20 min at 5,000 rpm) and washed twice in sterile  $H_2O$ . Cell pellets were then  
166 lyophilized overnight and stored at room temperature for up to 7 days. *R. johrii* cultures grown in  
167 LB for 2 days and lacking phase-bright objects were chosen as the negative control. For the whole-  
168 cell lipidomics analysis, methyl tert-butyl ether (MTBE)-based membrane lipid extraction

169 protocol was used with modifications (23). Briefly, samples in 1.5 ml Eppendorf vials were first  
170 mixed with 300  $\mu$ l ice-cold methanol and 10  $\mu$ l internal standards. The mixture was then sonicated  
171 in ice-water bath for 15 min for protein precipitation. 1 ml MTBE was added to the mixture,  
172 followed by vortex mixing for 20 min at room temperature for thorough lipid extraction. Next, 200  
173  $\mu$ l LC-MS grade water was added to induce phase separation, and the samples were further mixed  
174 for 30 s. After settling for 10 min, the upper layer, containing the lipids, was transferred to new  
175 Eppendorf vials. To dry the lipid samples, the solvent was evaporated using a vacuum concentrator  
176 at 4°C. 100  $\mu$ L isopropanol/acetonitrile (1:1, v/v) was added to reconstitute the dried residue. The  
177 reconstituted solution was vortexed for 30 s and centrifuged at 14,000 rpm at 4°C for 15 min. The  
178 resulting supernatants were transferred to glass inserts for liquid chromatography-tandem mass  
179 spectrometry (LC-MS/MS) analysis. Only lipids above the noise level (1000 average intensity)  
180 were considered in the analysis. A cut off value of at least 2x increase in average intensity, and the  
181 p-value threshold of 0.01 was used to determine significant increase in lipid species.

182

### 183 *Heat inactivation and counting of endospores*

184 After induction of the phase-bright objects in *R. johrii*, *S. marcescens*, and *B. subtilis* as described  
185 above, cells were washed with sterile, deionized water, spun at 10,000 g for 10 min, and  
186 resuspended in chilled water. Suspensions of *R. johrii* and *B. subtilis* were heated to 80 °C, and *S.*  
187 *marcescens* to 60 °C, for 15 min, 30 min and 1 hr, as described previously (16, 17). After the heat  
188 treatment, the samples were centrifuged for 10 min at 10,000 g. The pellets were washed five times  
189 to remove cellular debris, then plated on solid media. *R. johrii* was incubated at 30 °C for 7 days,  
190 *S. marcescens* was incubated at 32 °C for 7 days, and *B. subtilis* was incubated at 37 °C overnight,  
191 and plates were subsequently examined for viable growth.

192

193 *Dipicolinic acid (DPA) detection*

194 Following the detection of phase-bright objects, DPA was detected as previously described (24).  
195 Briefly, cultures of *R. johrii*, *S. marcescens*, and *B. subtilis* containing ~ 10 mg dry weight were  
196 autoclaved for 15 minutes at 15 lb/in<sup>2</sup>. The suspensions were cooled to ambient temperature,  
197 acidified with 0.1 ml of 1.0 N acetic acid and incubated for 1 hour to cluster the insoluble material.  
198 To remove cellular debris, the suspensions were centrifuged at 1,500 g for 10 minutes. To each 4  
199 ml of supernatant, 1 ml of 1 % Fe(NH<sub>4</sub>)<sub>2</sub>(SO<sub>4</sub>)<sub>2</sub>·6H<sub>2</sub>O and 1 % ascorbic acid in 0.5 M acetate buffer  
200 (pH 5.5) was added. Colorimetric shift at 440 nm was compared to a standard curve prepared with  
201 pure DPA (Sigma-Aldrich, Oakville, Canada).

202

203 *Detection of genes required for endospore production*

204 List of conserved genes, previously identified as essential for endospore formation, was compiled  
205 based on the studies by Galperin *et al.* and Meeske *et al.* (5, 25). The respective amino acid  
206 sequences, encoded by the model strain *B. subtilis* 168, were then retrieved from the UniProt  
207 database (<https://www.uniprot.org/>). Sequence searches were performed against the genomes of  
208 *R. johrii* JA192 and *S. marcescens* subsp. *sakuensis* KRED<sup>T</sup>, the two strains originally described  
209 by Girija *et al.* and Ajithkumar *et al.*, respectively (16, 17), using tBLASTn  
210 (<https://blast.ncbi.nlm.nih.gov/Blast.cgi>). Positive hits were defined by a BLAST score >60 and  
211 sequence identity >30 %.

212

213 **Results and Discussion**

214 **Prolonged incubation induces formation of phase-bright objects in *R. johrii* and *S.***

215 ***marcescens***

216 For initial assessment of the previously reported endospore formation, we cultivated *R. johrii* and  
217 *S. marcescens* according to the published conditions and examined the cultures with phase-contrast  
218 LM (Fig. 1). Vegetative *R. johrii* cells appeared phase-dark (Fig. 1A), however, upon 7-day  
219 incubation phase-bright objects were observed either at one pole or mid-cell (Fig. 1B, black  
220 arrows). Vegetative *S. marcescens* cells also appeared phase-dark (Fig. 1C). Although phase-bright  
221 objects were occasionally visible at mid-cell following 65-day incubation (Fig. 1D, black arrows),  
222 the majority of culture was dead and appeared as “ghost” cells (Fig. 1D, white arrows). Altogether,  
223 our results recapitulate reports of formation of phase-bright objects in *R. johrii* and *S. marcescens*  
224 following extended incubation in nutrient-limited conditions.

225

226 **Characterization of phase-bright objects in *R. johrii***

227 To further characterize the phase-bright objects observed in *R. johrii*, we performed correlative  
228 LM and cryo-ET experiments on phase-bright and phase-dark cells following extended incubation  
229 (Fig. 2). Tomograms of *R. johrii* cells with phase-bright objects revealed the presence of  
230 intracellular granules, which were highly sensitive to the electron beam, as represented by the  
231 sample damage (Fig. 2A). Beam sensitivity was detected regardless of the total dose used (25-150  
232  $e^-/A^2$ ), suggesting that the granules were rich in lipids. Further, the spherical nature of the granules  
233 resembled previously characterized storage granules (SG) in bacterial cells (26). No evidence of  
234 sporulation-associated morphological changes, such as engulfing membranes, presence of  
235 immature or mature spores in the sample (n=40), was observed, indicating that the phase-bright  
236 objects were not endospores. Finally, cells with phase-bright objects always displayed 1-3 of the

237 100-250 nm diameter granules (Fig. 2A), whereas the phase-dark cells lacked the presence of  
238 granules (Fig. 2B). Thus, our observations suggest that the phase-bright objects were likely lipid-  
239 containing SGs.

240  
241 To determine the composition of the storage granules, we performed correlative LM and SEM in  
242 combination with EDX compositional analysis. Cells possessing the putative storage granules  
243 were identified with phase-contrast microscopy (Fig. 3A) and examined in higher resolution with  
244 SEM (Fig. 3B). Correlative LM and SEM was then used to guide EDX analysis, so that spectra  
245 were collected from a region containing the putative storage granules and a cytoplasmic region  
246 lacking the storage granules (Fig. 3C). Elemental analysis of the storage granule (blue spectrum)  
247 revealed counts for carbon (C) 80.24 %, oxygen (O) 13.26%, and copper (Cu) 6.5% (due to the  
248 copper of the EM grid). Cytoplasmic analysis (red spectrum) revealed lower counts for carbon (C)  
249 61.7% and oxygen (O) 10.82%, copper (Cu) at 6.59%, and elevated counts for nitrogen (N) 20.9%  
250 (Fig. 4C).

251  
252 Based on the cryo-ET and EDX data, we hypothesized that the granules observed in *R. johrii* were  
253 composed of lipids, as lipids are enriched in carbon and oxygen atoms. To characterize the nature  
254 of the granular composition, we performed whole-cell lipidomics analysis of *R. johrii* 7-day old  
255 culture expressing phase-bright objects (granules) against *R. johrii* cells grown for 2 days and  
256 lacking phase-bright objects as the negative control. Cells producing putative storage granules  
257 were enriched in several lipids, the most abundant of which were triacylglycerols (TAGs) and  
258 phosphatidylethanolamines (PEs) (Table 1). Because PEs are typical membrane lipids, the  
259 increased levels observed under starvation conditions suggested that cells remodel their membrane

260 composition to account for the environmental changes. TAGs are nonpolar triacylglycerols that  
261 occur as insoluble inclusions in bacteria and are considered a major source of energy (27, 28).  
262 TAGs have been shown to accumulate in actinobacteria and mycobacteria as either peripheral  
263 deposits associated with the cell envelope, or as inclusion bodies in the cytoplasm (29). Previously,  
264 *in vitro* studies showed that mycobacteria accumulated TAG and wax ester when subjected to  
265 stresses, such as low oxygen, high CO<sub>2</sub>, low nutrients and low pH (29-31). Similarly, we observed  
266 an increased propensity to form the phase-bright objects in *R. johrii* cells incubated under low-  
267 nitrogen conditions in defined media. Therefore, it is likely that *R. johrii* utilizes TAG storage as  
268 an adaptive strategy in response to starvation, allowing cells to enter stationary phase and survive  
269 for longer periods of time. We thus conclude that the granules observed as phase-bright objects in  
270 *R. johrii* were storage granules enriched in TAGs.

271

#### 272 **Characterization of phase-bright objects in *S. marcescens***

273 Tomograms of *S. marcescens* were collected on 2-day and 65-day old cultures (Fig. 4). At 2 days,  
274 we observed regular morphology of vegetative cells, displaying cell envelope architecture typical  
275 for Gram-negative bacteria (Fig. 4A). *S. marcescens* grown for 65 days revealed the presence of  
276 two kinds of morphologies: cells packed with cellular debris (black star), and cells void of any  
277 cellular material (white star) (Fig. 4B), likely correlating to cells containing phase-bright objects  
278 and “ghost” cells identified using LM, respectively. Extensive survey of the sample (n=80) did not  
279 reveal any cells possessing intracellular membranes, or morphologies suggestive of engulfing  
280 membranes or stages of sporulation. Neither of the two identified morphologies displayed any  
281 features similar to a cortex or proteinaceous spore coat characteristic of mature endospores.  
282 Additionally, we did not observe accumulation of storage granules within cells. Together, these

283 results suggest that the appearance of phase-bright objects in *S. marcescens* was the result of  
284 accumulation of cellular debris, and dehydration.

285

### 286 **Proteobacteria do not possess features of endospores following extended incubation**

287 Independent of imaging-based methods, endospores have traditionally been identified in samples  
288 through heat resistance and increased concentration of intracellular DPA. To verify the results of  
289 our cryo-ET experiments, we first investigated the heat resistance properties of *R. johrii* and *S.*  
290 *marcescens* following prolonged incubation and subsequent exposure to high temperatures.  
291 Despite an extended recovery period of 7 days, no viable *R. johrii* cells were observed on solid  
292 media following 15, 30 and 60 min incubation at 80 °C. Similarly, viable cells were not isolated  
293 from *S. marcescens* cultures incubated at 60 °C for 15, 30, and 60 min. In contrast, *B. subtilis*  
294 cultures producing endospores and treated at 80 °C for 15, 30, and 60 min yielded viable growth  
295 on solid media after a 24 hr recovery period. Thus, we were unable to replicate the results of Girija  
296 *et al.* and Ajithkumar *et al.*, who found viable cells following heat treatment of *R. johrii* at 80 °C  
297 for 20 min, and *S. marcescens* at 60 °C for 15 min, respectively. Additionally, we quantitatively  
298 analyzed the presence of DPA in cultures of *R. johrii* and *S. marcescens* displaying phase-bright  
299 objects using a colorimetric method. Whereas the purified endospores of *B. subtilis* contained 6.74  
300 µg/ml DPA, no detectable amounts of DPA were observed in *R. johrii* and *S. marcescens* after  
301 prolonged cultivation. Collectively, these results indicate that *R. johrii* and *S. marcescens* cells do  
302 not possess the classic phenotypic features that are associated with endospore formation.

303

### 304 **Minimal subset of genes required for endospore formation not conserved in the** 305 **Proteobacteria**

306 Endospore formation relies on expression of hundreds of genes in a highly regulated manner (19,  
307 32, 33). For example, over 500 genes have been previously implicated in sporulation in the model  
308 firmicute *B. subtilis* (32). However, establishment of the minimal subset of genes required for  
309 endospore formation remain elusive, as many of the identified targets carry out redundant  
310 functions, *e.g.* histidine kinases, or are part of general pathways loosely associated with  
311 sporulation, such as iron uptake and DNA repair proteins (34). Consistently, several homologs to  
312 genes linked to sporulation have been detected in other phyla, including Proteobacteria, but have  
313 been shown to play regulatory roles in distinct processes, such as cell division and development  
314 (35, 36). Hence, possession of genes annotated as sporulative should not be considered concrete  
315 evidence to support sporulation capacity in a given species (5). Nevertheless, we investigated the  
316 genomes of *R. johrii* and *S. marcescens* for presence of genes that are conserved among all spore-  
317 forming bacilli and clostridia, and have been shown to play pivotal roles in endospore formation  
318 through functional studies (Table 2-3) (5, 25). Our analysis showed that that both *R. johrii* and *S.*  
319 *marcescens* completely lack the SpoIIDMP peptidoglycan remodeling complex required for spore  
320 cortex formation, the SpoIIQ-SpoIIIAA-AH channel complex involved in communication  
321 between the mother cell and the prespore and facilitating regulation of endospore maturation, as  
322 well as the major protein coat assembly components, such as SpoIVA and Alr (12, 14, 37). Further,  
323 the master regulator of sporulation encoded by all endospore-formers, Spo0A, is absent in *R. johrii*.  
324 Both strains also lack homologs to three out of four sporulation sigma factors, SigF, SigE and  
325 SigK. Finally, *R. johrii* and *S. marcescens* do not possess DapB, required for production of  
326 dipicolinic acid which plays a major role in dehydration of the spore core and, therefore, resistance  
327 and dormancy (14). Therefore, our analysis confirms the lack of those conserved genes in the



328 genomes of *R. johrii* and *S. marcescens*. In addition, Ajithkumar *et al.* was also unable to detect  
329 genes related to endospore formation in *S. marcescens* (16).

330

### 331 **Concluding remarks**

332 Although endospore formation is considered a hallmark of the Firmicutes phylum (4, 5, 38),  
333 endospore production had been reported outside of Firmicutes, particularly in two members of the  
334 phylum Proteobacteria (16, 17). These findings may affect our understanding of the evolutionary  
335 events surrounding outer membrane biogenesis and the significance of endospore formation in cell  
336 differentiation. Here, using cutting-edge microscopy techniques, and biochemical,  
337 microbiological, as well as bioinformatics approaches, we showed that the phase-bright objects  
338 observed in *R. johrii* and *S. marcescens*, are storage granules and cellular debris, respectively. We  
339 did not observe mature spores or stages of endospore formation *in vivo*, and failed to detect the  
340 pivotal biochemical and genomic features of endospore-producing bacteria in these organisms.  
341 Our findings thus demonstrate that *R. johrii* and *S. marcescens* are unable to form true endospores,  
342 which is in contrast to the results described by Girija *et al.* (17) and Ajithkumar *et al.*(16). Since  
343 we used the most-advanced imaging techniques currently available to study whole-cell bacteria  
344 and their ultrastructure, previous results could be due to the presence of contamination with spore-  
345 forming bacteria or misinterpretation of methodology artifacts.

346

### 347 **Acknowledgements**

348 We thank Dr. Kaustuv Basu at the Facility for Electron Microscopy Research (FEMR) of McGill  
349 University and Dr. Claire Atkinson at the High Resolution Macromolecular Cryo-Electron  
350 Microscopy Facility at the University of British Columbia for help with microscope operation and

351 data collection. Work in the EIT lab was supported by Natural Sciences and Engineering Research

352 Council of Canada Discovery Grant (RGPIN 04345) and CRC Tier 2.

## 353 References

- 354 1. Cano RJ, Borucki MK. 1995. Revival and identification of bacterial spores in 25- to 40-  
355 million-year-old Dominican amber. *Science* 268:1060-4.
- 356 2. Kennedy MJ, Reader SL, Swierczynski LM. 1994. Preservation records of micro-  
357 organisms: evidence of the tenacity of life. *Microbiology* 140 ( Pt 10):2513-29.
- 358 3. Vreeland RH, Rosenzweig WD, Powers DW. 2000. Isolation of a 250 million-year-old  
359 halotolerant bacterium from a primary salt crystal. *Nature* 407:897-900.
- 360 4. Setlow P. 2007. I will survive: DNA protection in bacterial spores. *Trends Microbiol*  
361 15:172-80.
- 362 5. Galperin MY, Mekhedov SL, Puigbo P, Smirnov S, Wolf YI, Rigden DJ. 2012. Genomic  
363 determinants of sporulation in Bacilli and Clostridia: towards the minimal set of  
364 sporulation-specific genes. *Environ Microbiol* 14:2870-90.
- 365 6. Nicholson WL, Munakata N, Horneck G, Melosh HJ, Setlow P. 2000. Resistance of  
366 *Bacillus* endospores to extreme terrestrial and extraterrestrial environments. *Microbiol Mol*  
367 *Biol Rev* 64:548-72.
- 368 7. Vaksman Z, Kaplan HB. 2015. *Myxococcus xanthus* Growth, Development, and Isolation.  
369 *Curr Protoc Microbiol* 39:7A 1 1-7A 1 21.
- 370 8. Qinyuan L, Xiu C, Yi J, Chenglin J. 2016. Morphological Identification of Actinobacteria. *In*  
371 Dharumadurai D, Yi J (ed), *Actinobacteria* doi:10.5772/61461. IntechOpen.
- 372 9. Bobek J, Šmídová K, Čihák M. 2017. A Waking Review: Old and Novel Insights into the  
373 Spore Germination in *Streptomyces*. *Frontiers in Microbiology* 8:2205.
- 374 10. Tocheva EI, Ortega DR, Jensen GJ. 2016. Sporulation, bacterial cell envelopes and the  
375 origin of life. *Nat Rev Microbiol* 14:535-542.
- 376 11. Stragier P, Losick R. 1996. Molecular genetics of sporulation in *Bacillus subtilis*. *Annu*  
377 *Rev Genet* 30:297-41.
- 378 12. Piggot PJ, Hilbert DW. 2004. Sporulation of *Bacillus subtilis*. *Curr Opin Microbiol* 7:579-  
379 86.
- 380 13. Errington J. 2003. Regulation of endospore formation in *Bacillus subtilis*. *Nat Rev*  
381 *Microbiol* 1:117-26.
- 382 14. Errington J. 1993. *Bacillus subtilis* sporulation: regulation of gene expression and control  
383 of morphogenesis. *Microbiol Rev* 57:1-33.
- 384 15. Tocheva EI, Lopez-Garrido J, Hughes HV, Fredlund J, Kuru E, Vannieuwenhze MS, Brun  
385 YV, Pogliano K, Jensen GJ. 2013. Peptidoglycan transformations during *Bacillus subtilis*  
386 sporulation. *Mol Microbiol* 88:673-86.
- 387 16. Ajithkumar B, Ajithkumar VP, Iriye R, Doi Y, Sakai T. 2003. Spore-forming *Serratia*  
388 *marcescens* subsp. *sakuensis* subsp. nov., isolated from a domestic wastewater treatment  
389 tank. *Int J Syst Evol Microbiol* 53:253-8.
- 390 17. Girija KR, Sasikala C, Ramana Ch V, Sproer C, Takaichi S, Thiel V, Imhoff JF. 2010.  
391 *Rhodobacter johrii* sp. nov., an endospore-producing cryptic species isolated from semi-  
392 arid tropical soils. *Int J Syst Evol Microbiol* 60:2099-107.
- 393 18. Galperin MY. 2013. Genome Diversity of Spore-Forming Firmicutes. *Microbiol Spectr* 1.  
394 19. Steil L, Serrano M, Henriques AO, Volker U. 2005. Genome-wide analysis of temporally  
395 regulated and compartment-specific gene expression in sporulating cells of *Bacillus*  
396 *subtilis*. *Microbiology* 151:399-420.
- 397 20. Hejazi A, Falkner FR. 1997. *Serratia marcescens*. *J Med Microbiol* 46:903-12.

- 398 21. Kremer JR, Mastronarde DN, McIntosh JR. 1996. Computer visualization of three-  
399 dimensional image data using IMOD. *J Struct Biol* 116:71-6.
- 400 22. Gunsolus IL, Hu D, Mihai C, Lohse SE, Lee C-s, Torelli MD, Hamers RJ, Murhpy CJ, Orr  
401 G, Haynes CL. 2014. Facile method to stain the bacterial cell surface for super-resolution  
402 fluorescence microscopy. *The Analyst* 139:3174-3178.
- 403 23. Matyash V, Liebisch G, Kurzchalia TV, Shevchenko A, Schwudke D. 2008. Lipid  
404 extraction by methyl-tert-butyl ether for high-throughput lipidomics. *J Lipid Res* 49:1137-  
405 46.
- 406 24. Janssen FW, Lund AJ, Anderson LE. 1958. Colorimetric assay for dipicolinic acid in  
407 bacterial spores. *Science* 127:26-7.
- 408 25. Meeske AJ, Rodrigues CD, Brady J, Lim HC, Bernhardt TG, Rudner DZ. 2016. High-  
409 Throughput Genetic Screens Identify a Large and Diverse Collection of New Sporulation  
410 Genes in *Bacillus subtilis*. *PLoS Biol* 14:e1002341.
- 411 26. Wahl A, Schuth N, Pfeiffer D, Nussberger S, Jendrossek D. 2012. PHB granules are  
412 attached to the nucleoid via PhaM in *Ralstonia eutropha*. *BMC Microbiology* 12:262.
- 413 27. Alvarez HM, Kalscheuer R, Steinbuechel A. 2000. Accumulation and mobilization of  
414 storage lipids by *Rhodococcus opacus* PD630 and *Rhodococcus ruber* NCIMB 40126.  
415 *Appl Microbiol Biotechnol* 54:218-23.
- 416 28. Alvarez HM, Steinbuechel A. 2002. Triacylglycerols in prokaryotic microorganisms. *Appl*  
417 *Microbiol Biotechnol* 60:367-76.
- 418 29. Maurya RK, Bharti S, Krishnan MY. 2018. Triacylglycerols: Fuelling the Hibernating  
419 *Mycobacterium tuberculosis*. *Front Cell Infect Microbiol* 8:450.
- 420 30. Shabtai Y. 1991. Isolation and characterization of a lipolytic bacterium capable of growing  
421 in a low-water-content oil-water emulsion. *Appl Environ Microbiol* 57:1740-5.
- 422 31. Santucci P, Johansen MD, Point V, Poncin I, Viljoen A, Cavalier JF, Kremer L, Canaan S.  
423 2019. Nitrogen deprivation induces triacylglycerol accumulation, drug tolerance and  
424 hypervirulence in mycobacteria. *Sci Rep* 9:8667.
- 425 32. Shi L, Derouiche A, Pandit S, Rahimi S, Kalantari A, Futo M, Ravikumar V, Jers C,  
426 Mokkapati V, Vlahovicek K, Mijakovic I. 2020. Evolutionary analysis of the *Bacillus*  
427 *subtilis* genome reveals new genes involved in sporulation. *Mol Biol Evol*  
428 doi:10.1093/molbev/msaa035.
- 429 33. Veening JW, Murray H, Errington J. 2009. A mechanism for cell cycle regulation of  
430 sporulation initiation in *Bacillus subtilis*. *Genes Dev* 23:1959-70.
- 431 34. Dembek M, Barquist L, Boinett CJ, Cain AK, Mayho M, Lawley TD, Fairweather NF,  
432 Fagan RP. 2015. High-throughput analysis of gene essentiality and sporulation in  
433 *Clostridium difficile*. *mBio* 6:e02383.
- 434 35. Rigden DJ, Galperin MY. 2008. Sequence analysis of GerM and SpoVS, uncharacterized  
435 bacterial 'sporulation' proteins with widespread phylogenetic distribution. *Bioinformatics*  
436 24:1793-7.
- 437 36. Onyenwoke RU, Brill JA, Farahi K, Wiegel J. 2004. Sporulation genes in members of the  
438 low G+C Gram-type-positive phylogenetic branch ( Firmicutes). *Arch Microbiol* 182:182-  
439 92.
- 440 37. Rodrigues CD, Henry X, Neumann E, Kurauskas V, Bellard L, Fichou Y, Schanda P,  
441 Schoehn G, Rudner DZ, Morlot C. 2016. A ring-shaped conduit connects the mother cell  
442 and forespore during sporulation in *Bacillus subtilis*. *Proc Natl Acad Sci U S A* 113:11585-  
443 11590.

- 444 38. Paredes CJ, Alsaker KV, Papoutsakis ET. 2005. A comparative genomic view of clostridial  
445 sporulation and physiology. *Nat Rev Microbiol* 3:969-78.  
446

447 **Table 1. Lipidomics analysis of whole *R. johrii* cells.**

| Lipid <sup>a</sup>                 | Lipid class | Fold change<br>R.j + / R.j - | P-value  |
|------------------------------------|-------------|------------------------------|----------|
| PE 33:1; PE 16:0-17:1 <sup>c</sup> | PE          | 147.84                       | 4.71E-09 |
| TAG 58:1; TAG 16:0-24:0-18:1       | TAG         | 93.81                        | 1.81E-08 |
| TAG 52:3; TAG 16:0-18:1-18:2       | TAG         | 67.19                        | 1.24E-08 |
| TAG 54:5; TAG 18:1-18:2-18:2       | TAG         | 60.41                        | 1.37E-06 |
| TAG 52:2; TAG 18:0-16:1-18:1       | TAG         | 57.72                        | 1.93E-07 |
| TAG 54:4; TAG 18:1-18:1-18:2       | TAG         | 54.46                        | 2.37E-08 |
| TAG 52:1; TAG 16:0-18:0-18:1       | TAG         | 49.15                        | 1.22E-10 |
| TAG 56:2; TAG 16:0-18:1-22:1       | TAG         | 48.89                        | 5.37E-09 |
| TAG 50:1; TAG 16:0-16:0-18:1       | TAG         | 46.43                        | 7.39E-09 |
| TAG 54:2; TAG 18:0-18:1-18:1       | TAG         | 44.82                        | 2.37E-09 |
| TAG 58:2; TAG 16:0-18:1-24:1       | TAG         | 42.04                        | 9.59E-09 |
| TAG 52:2; TAG 16:0-18:1-18:1       | TAG         | 41.06                        | 5.93E-09 |
| TAG 56:1; TAG 16:0-22:0-18:1       | TAG         | 39.72                        | 8.65E-10 |
| TAG 54:1; TAG 18:0-18:0-18:1       | TAG         | 39.35                        | 1.15E-08 |
| TAG 54:3; TAG 18:0-18:1-18:2       | TAG         | 17.15                        | 3.93E-08 |
| TAG 50:2; TAG 16:0-16:1-18:1       | TAG         | 12.30                        | 1.90E-08 |
| PE 32:0; PE 16:0-16:0              | PE          | 11.55                        | 1.73E-06 |
| PC 39:3                            | PC          | 10.77                        | 1.06E-08 |
| PE 32:1; PE 16:0-16:1              | PE          | 7.68                         | 3.84E-07 |
| TAG 48:1; TAG 14:0-16:0-18:1       | TAG         | 4.94                         | 2.00E-05 |
| PE 35:2; PE 17:1-18:1              | PE          | 3.09                         | 6.92E-06 |
| PC 36:4                            | PC          | 3.03                         | 4.93E-06 |
| TAG 48:1; TAG 16:0-16:0-16:1       | TAG         | 2.52                         | 4.51E-03 |
| PC 32:1                            | PC          | 2.18                         | 4.46E-07 |
| PC 34:1; PC 16:0-18:1              | PC          | 2.15                         | 6.50E-08 |
| DAG 36:2; DAG 18:1-18:1            | DAG         | 2.08                         | 5.34E-08 |
| PC 34:2; PC 16:1-18:1              | PC          | 2.02                         | 1.57E-06 |

448 <sup>a</sup> Abbreviations: phosphatidyl ethanolamine, PE; triacylglycerols, TAG; phosphatidylcholine,  
 449 PC; diglyceride, DAG

450 <sup>b</sup> the total lipid composition of *R. johrii* expressing storage granules (R.j +) was compared to a  
 451 fresh *R. johrii* culture lacking storage granules (R.j -)

452 <sup>c</sup> PE is a lipid class with two acyl chains (R1 and R2 in B). PE 16:0-17:1 indicates that the chain  
 453 lengths are 16 carbons and 17 carbons, and the saturation degrees are 0 and 1, respectively. PE  
 454 33:1 is the simpler form of PE 16:0-17:1.  
 455

456

457 **Table 2. Analysis for presence of the minimal subset of endospore genes in *R. johrii***  
 458 **and *S. marcescens*.**

| Essential endospore genes defined by Galperin et al. (5)                                                                                                                                                                                                                                                                                                                                                                                                                                                                    | Present in <i>R. johrii</i>                                                    | Present in <i>S. marcescens</i>                                              |
|-----------------------------------------------------------------------------------------------------------------------------------------------------------------------------------------------------------------------------------------------------------------------------------------------------------------------------------------------------------------------------------------------------------------------------------------------------------------------------------------------------------------------------|--------------------------------------------------------------------------------|------------------------------------------------------------------------------|
| <p><i>alr, cwID, dacB, dapA, dapB, gpr, jag, lgt (gerF), obgE, spmA, spmB, spo0A, spo0J (parB), spo0H (sigH), spoIIAA, spoIIAB, spoIIAC (sigF), spoIID, spoIIE, spoIIGA, spoIIGB (sigE), spoIIM, spoIIP, spoIIR, spoIIIAA, spoIIIAB, spoIIIAC, spoIIIAD, spoIIIAE, spoIIIAF, spoIIIAG, spoIIIAH, spoIIIC (sigK), spoIIID, spoIIIE, spoIIIG (sigG), spoIIIJ, spoIVA, spoIVB, spoIVH (stoA), spoVAC, spoVAD, spoVAEB, spoVB, spoVC, spoVD, spoVG, spoVK, spoVS, spoVT, yabP, yabQ, ylbJ, ylmC, yqfC, yqfD, ytvI, yyaC</i></p> | <p><i>dacB, dapA, obgE, spo0J, spoIIIE, spoIIIG, spoIIIJ, spoVC, spoVK</i></p> | <p><i>alr, dacB, dapA, obgE, spo0A, spoIIIE, spoIIIG, spoIIIJ, spoVC</i></p> |

459

460

461 **Table 3. Survey for presence of additional endospore genes in *R. johrii* and *S.***  
 462 ***marcescens*.**

| Spore genes identified by Meeske <i>et al.</i> (25)                                                                                                                                                                                                                                                                                                                                                                                                                                                                                                                                                                                                                                                                                                                                                                                                                                                                                                                                                                                                                                                                                                                                                                                                              | Present in <i>R. johrii</i>                                                                                                                                                                                                       | Present in <i>S. marcescens</i>                                                                                                                                                                                                                      |
|------------------------------------------------------------------------------------------------------------------------------------------------------------------------------------------------------------------------------------------------------------------------------------------------------------------------------------------------------------------------------------------------------------------------------------------------------------------------------------------------------------------------------------------------------------------------------------------------------------------------------------------------------------------------------------------------------------------------------------------------------------------------------------------------------------------------------------------------------------------------------------------------------------------------------------------------------------------------------------------------------------------------------------------------------------------------------------------------------------------------------------------------------------------------------------------------------------------------------------------------------------------|-----------------------------------------------------------------------------------------------------------------------------------------------------------------------------------------------------------------------------------|------------------------------------------------------------------------------------------------------------------------------------------------------------------------------------------------------------------------------------------------------|
| <p><i>araR, asnO, bofA, ccdA, citB, citZ, clpC, cotE, ctpB, cwlD, dacB, defB, dglA, divIVA, dnaJ, dnaK, ecsA, ecsB, efp, fin, ftsH, gapB, germ, gldA, gpr, grpE, gtaB, icd, kbaA, kipA, lgt (gerF), mdh, miaA, minC, mind, minJ, mntR, ndk, nraA, odhA, odhB, pdaA, pdhA, pdhB, pdhC, pdhD, pgcA, prkA, prpC, putB (ycgM), ras, resA, rex, rsfA, safA, sdhA, sdhB, sdhC, skjE, skjF, sleB, smpB, speD, speE, spmA, spmB, spo0A, spo0B, spo0F, spo0H (sigH), spo0J (parB), spo0KA (oppA), spo0KB (oppB), spo0KC (oppC), spo0KD (oppD), spo0KE (oppF), spoIIAA, spoIIAB, spoIIAC (sigF), spoIIB, spoIID, spoIIE, spoIIGA, spoIIGB (sigE), spoIIJ (kinA), spoIIM, spoIIP, spoIIQ, spoIIR, spoIIIAA, spoIIIAB, spoIIIIAC, spoIIIIAD, spoIIIIAE, spoIIIIAF, spoIIIIAG, spoIIIIAH, spoIIIIIC (sigK), spoIIIID, spoIIIII, spoIIIIIG (sigG), spoIIIIJ, spoIVA, spoIVB, spoIVCA, spoIVCB (sigK), spoIVFA, spoIVFB, spoIVH (stoA), spoVAA, spoVAB, spoVAC, spoVAD, spoVAEB, spoVB, spoVD, spoVE, spoVFA, spoVFB, spoVG, spoVID, spoVIE (pdaB), spoVIF, spoVIGA (ytrH), spoVIGB (ytrI), spoVK, spoVM, spoVR, spoVS, spoVT, sucC, sucD, trmE, ugtP, uppP, yaaD, yaaT, yabP, yabQ, ydcC, yerC, yhbH, yjbH, ylbF, ylbJ, ymcA, ymdB, yqfC, yqfD, yqhT, ytaF, ytvI, ytxG</i></p> | <p><i>ccdA clpC, ctpB, dacB, defB, dnaJ, dnaK, efp, ftsH, gapB, grpE, gtaB, klpA, miaA, ndk, prpC, skjE, smpB, spo0F, spo0J, spo0KA, spo0KB, spo0KC, spo0KD, spo0KE, spoIIJ, spoIIIE, spoIIIG, spoIIIJ, spoVK, trmE, yqhT</i></p> | <p><i>araR, clpC, ctpB, dacB, dnaJ, dnaK, ecsA, efp, ftsH, gapB, gldA, grpE, gtaB, kipA, miaA, minD, mntR, ndk, prkA, skjE, smpB, speE, spo0A, spo0F, spo0KA, spo0KB, spo0KC, spo0KD, spo0KE, spoIIJ, spoIIIE, spoIIIG, spoIIII, trmE, yqhT,</i></p> |

463

464



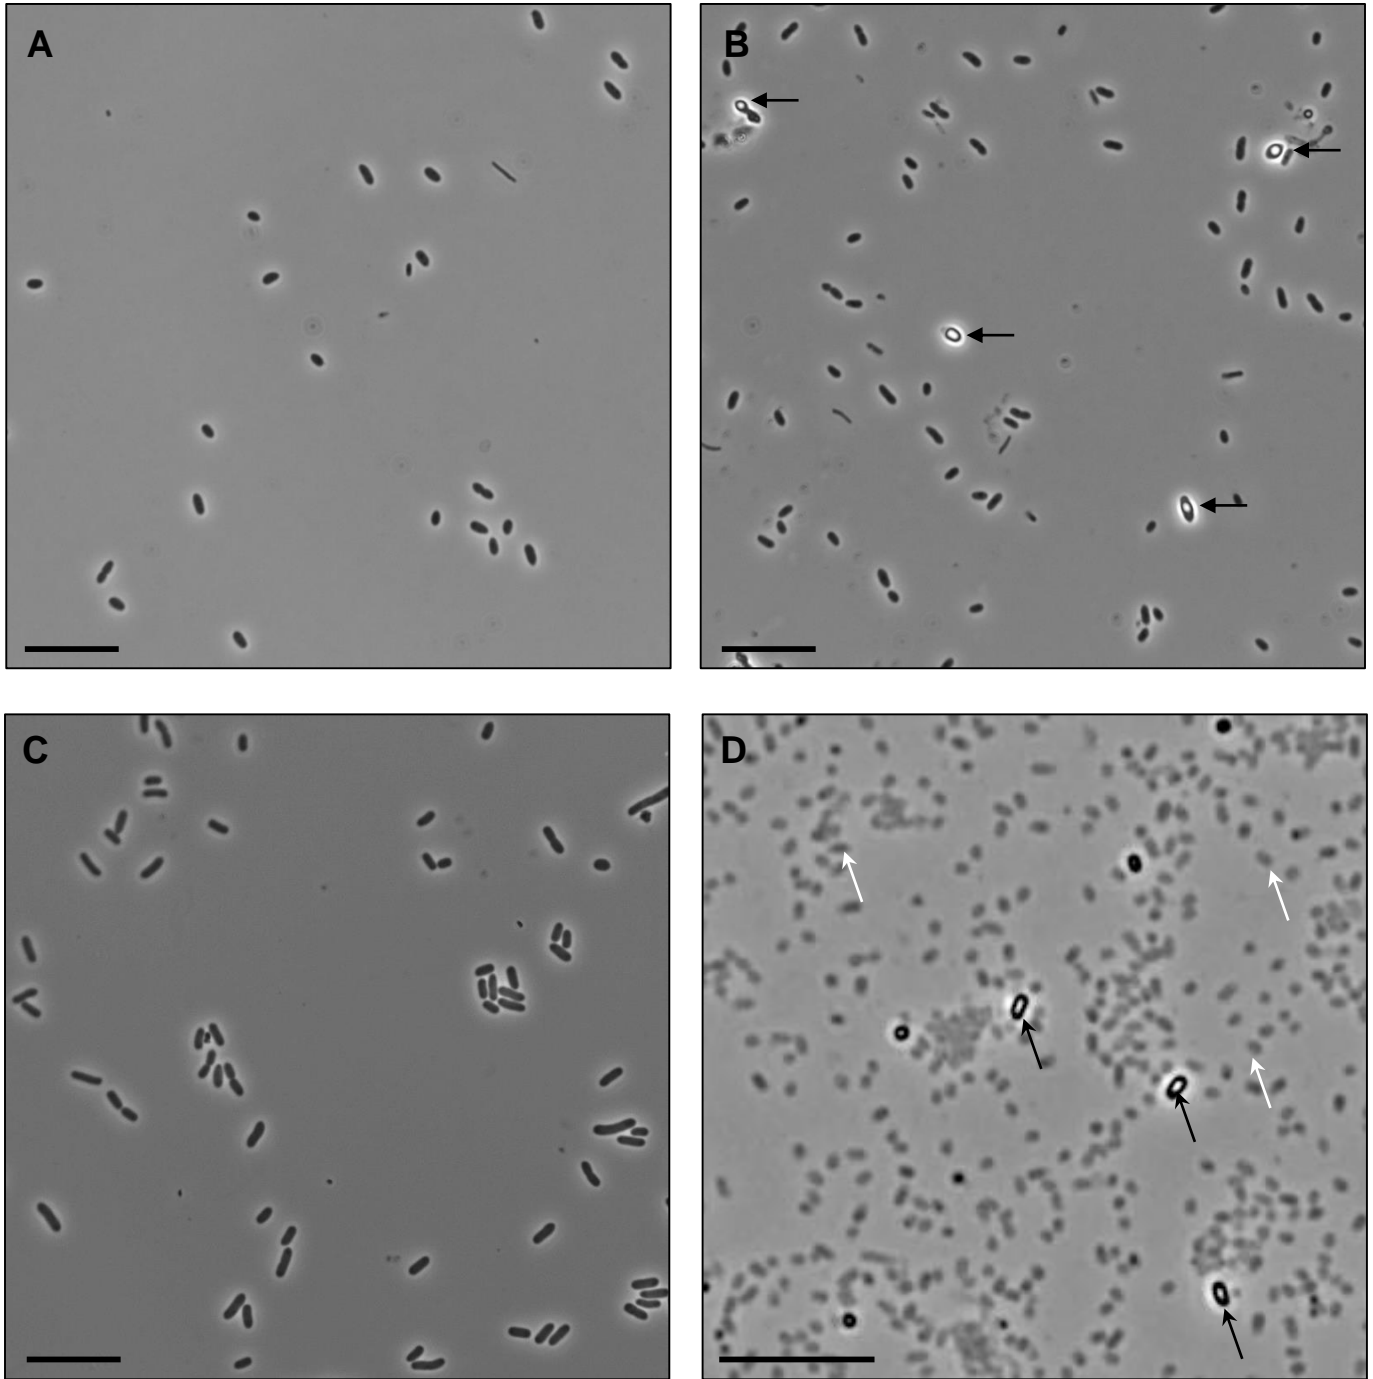

**Figure 1. Phase-contrast light microscopy of *R. johrii* and *S. marcescens* cells.** A) 2-day old *R. johrii* cells lack phase-bright objects; B) 7-day old *R. johrii* cells with phase-bright objects (black arrows). C) 7-day old *S. marcescens* cells lack phase-bright objects. D) After 65 days, *S. marcescens* cells show two kinds of cell morphologies: phase-bright (black arrows), and “ghost” cells (white arrows). Scale bar 10  $\mu\text{m}$ .

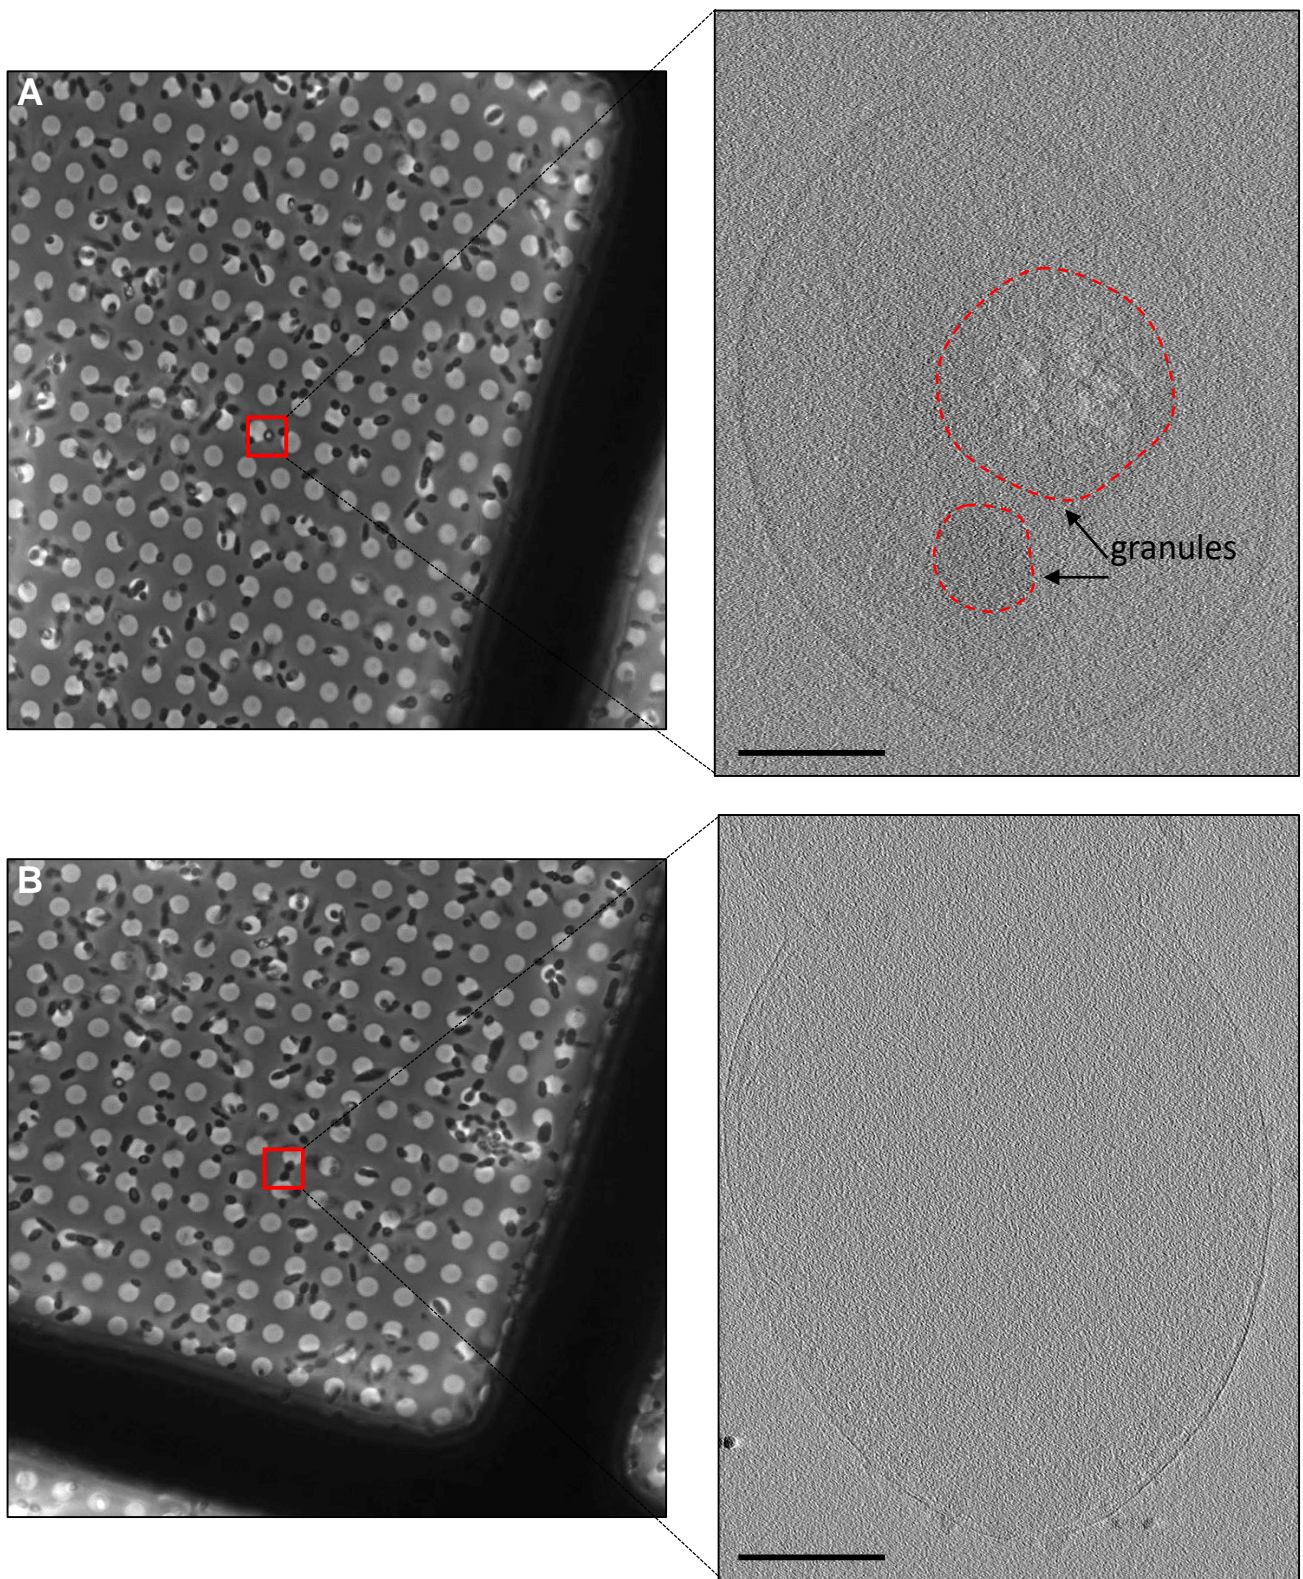

**Figure 2. Correlative light and cryo-ET of *R. johrii*.** (A) Left: Phase-contrast microscopy image of a *R. johrii* cell (boxed) displaying a phase-bright object. Right: tomographic slice of the same cell showing two granular structures. (B) Left: Phase-contrast microscopy image of *R. johrii* cells (boxed) lacking phase-bright objects. Right: tomographic slice of the same cell showing lack of sub-cellular structures. Scale bar 200nm.



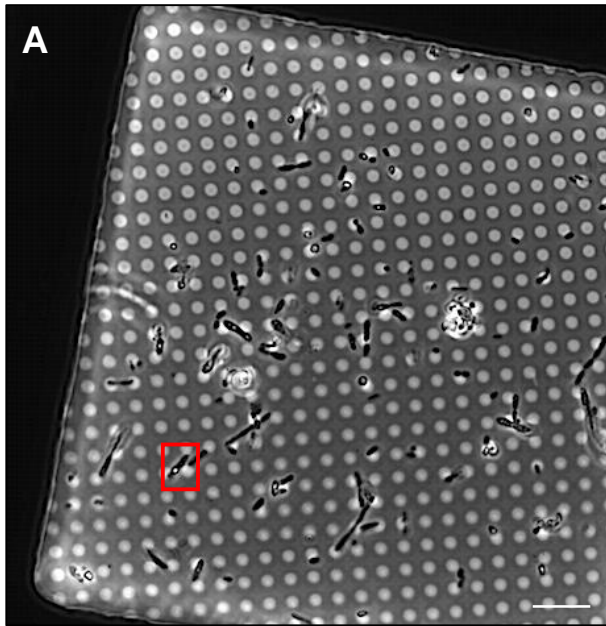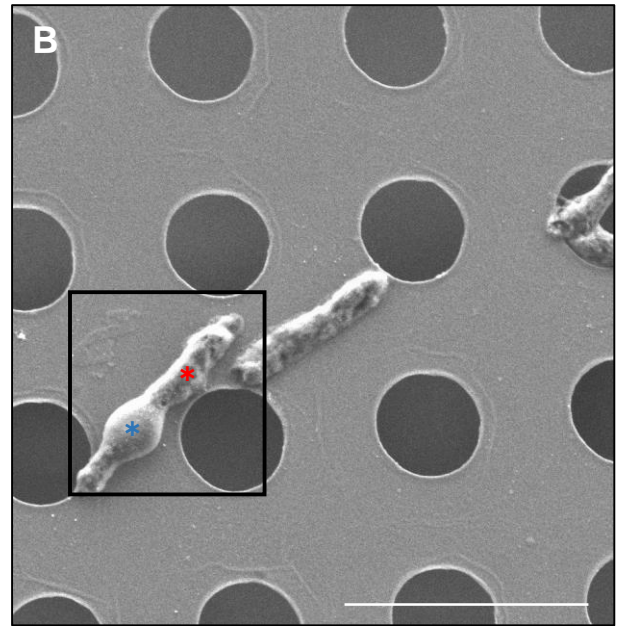

C

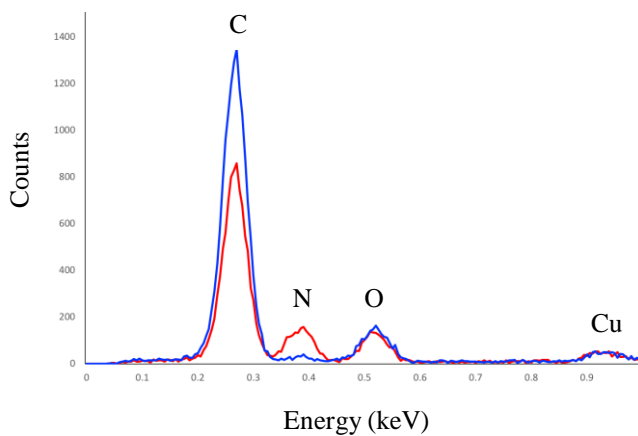

| Storage granule (blue) |          | Cytoplasm (red) |          |
|------------------------|----------|-----------------|----------|
| Element                | Weight % | Element         | Weight % |
| C K                    | 80.24    | C K             | 61.7     |
| O K                    | 13.26    | O K             | 10.82    |
| Cu L                   | 6.5      | Cu L            | 6.59     |
| N K                    | ND       | N K             | 20.9     |

**Figure 3. Correlative LM and SEM of *R. johrii* for storage granule characterization with EDX.** (A) LM image of *R. johrii* shows the presence of storage granules (phase-bright objects) inside a cell (red square). (B) The same cell as in panel A imaged with SEM. Areas corresponding to the storage granule and cytoplasm are depicted as blue and red stars, respectively. (C) Elemental composition of the storage granule (blue) and cytoplasm (red) using EDX semi-quantitative analysis. Major peaks are assigned and data is summarized in a table format. Scale bar 10 $\mu$ m (A), 5  $\mu$ m (B). ND – non-detected.

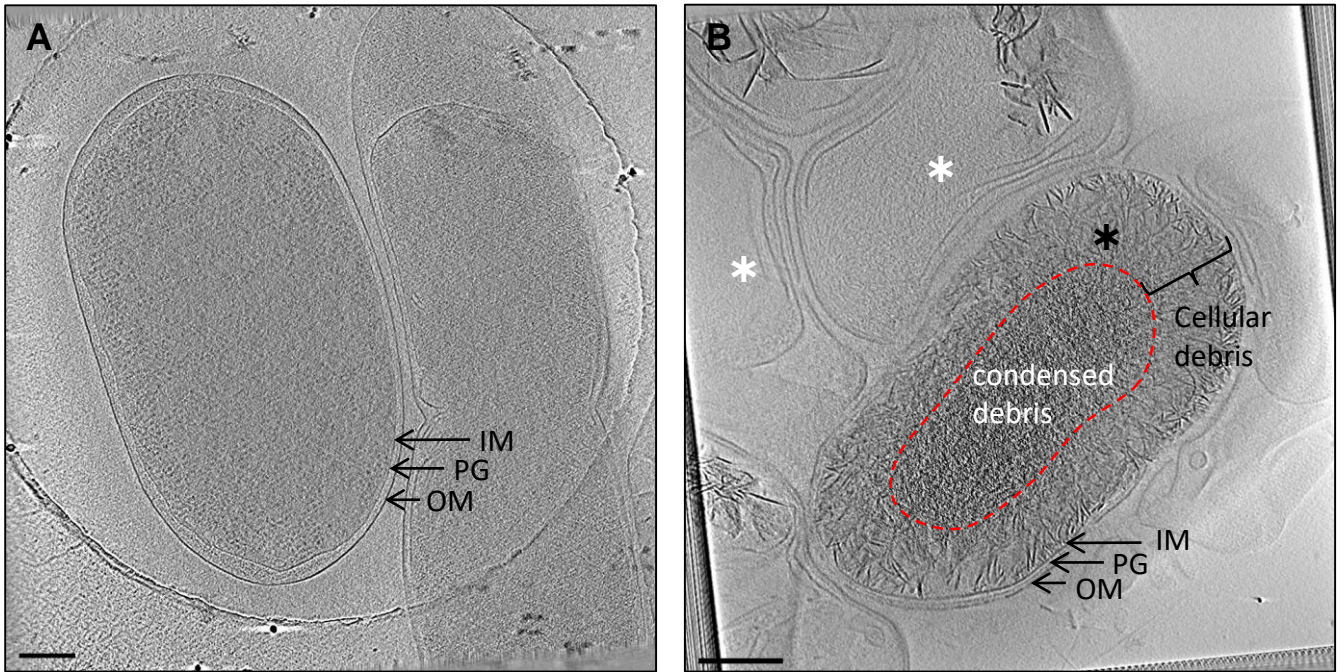

**Figure 4. Cryo-ET of *S. marcescens*.** Tomographic slices through: (A) Vegetative cells from a 2-day old culture; (B) Cells from a 65-day old culture showing phase-bright objects. Panel B shows two cell types: cells with accumulated cellular debris (black star) and “ghost cells” void of cellular material (white star). Scale bar 200 nm. IM, inner membrane; PG, peptidoglycan; OM, outer membrane.
